1 **Enrichment of de novo mutations in non SNP sites in autism spectrum**

2 **disorders and an empirical test of the neutral DNA model**

3

4 Ye Zhang and Shi Huang\*

5

6 Center for Medical Genetics, School of Life Sciences, Xiangya Medical School,

7 Central South University, Changsha, Hunan 410078, People's Republic of China

8

9 \*Corresponding author.

10 Email: [huangshi@sklmg.edu.cn](mailto:huangshi@sklmg.edu.cn)

11

12 **Keywords:** autism, de novo mutations, parity rule, AT content, neutral theory, infinite

13 site, maximum genetic diversity hypothesis

14

15 **Short title:** De novo mutations in autism

---

16 **Abstract**

17 The genetic basis of autism spectrum disorders (ASD) remains better understood and  
18 might concern only a small fraction of the genome if the neutral theory were true. We here  
19 analyzed published de novo mutations (DNMs) in ASD and controls. We found that DNMs  
20 in normal subjects occurred at positions bearing SNPs at least 3.45 fold more frequent  
21 than expected from the neutral theory, whereas DNMs in ASD were less frequent relative  
22 to those in controls, especially so for common SNPs with minor allele frequency >0.01.  
23 Among sites bearing both SNPs and DNMs, DNMs in controls occurred significantly more  
24 frequent than DNMs in ASD at reference allele sites bearing C or G nucleotides, indicating  
25 depletion of ASD associated DNMs in known regions of hypermutability or less functional  
26 constraints such as CpG sites. We also analyzed the nucleotide compositions of DNMs  
27 and the parity (1:1 ratio) of pyrimidines and purines. We found that DNMs in ASD showed  
28 overall lower AT content than that in controls. Parity violations and AT bias in DNMs  
29 occurred at expected frequency based on chance in both ASD and controls. These results  
30 show enrichment of DNMs at positions bearing SNP sites and C or G sites in normal  
31 subjects and less so in ASD, which is not expected from the neutral model, and indicate  
32 that DNMs are on average more deleterious in ASD than in controls.

33

---

34 **Introduction:**

35 Autism spectrum disorders (ASD) is a common disease today with a prevalence of  
36 14.6 per 1,000 (one in 68) children aged 8 years in the United States at 2012<sup>1</sup>. It is four  
37 times more common in males than in females<sup>2,3</sup>. Twin and family studies show that  
38 siblings of children with ASD are at a significant higher risk for autism than the general  
39 population<sup>4-6</sup>. ASD remains poorly understood but may have a strong genetic component  
40 with a heritability of 40–80%<sup>7-10</sup>. ASD are genetically highly heterogeneous, with no single  
41 gene accounting for more than 1% of cases<sup>11</sup>.

42 Recent work has shown a substantial contribution of de novo variations<sup>12-15</sup>.  
43 Probands of ASD, relative to unaffected siblings, have been found to more likely carry  
44 multiple coding and noncoding DNMs in different genes, which are enriched for  
45 expression in striatal neurons<sup>16</sup>. Genome-wide association studies have revealed few  
46 replicable common polymorphisms associated with ASD<sup>17-20</sup>. Common genetic variants  
47 are individually of little effect but acting additively may be a major source of risk for autism  
48<sup>21</sup>. Assortative mating may play a role in bringing about enrichment of ASD alleles in an  
49 affected child<sup>22</sup>. Consistent with the notion of collective and additive effects of common  
50 variants, recent studies indicate a role for genome wide minor allele content (MAC) of an  
51 individual in a variety of complex traits and diseases<sup>23-26</sup>. The more the number of minor  
52 alleles of common SNPs in an individual, the higher the risk in general for many complex  
53 diseases such as type 2 diabetes, schizophrenia, and Parkinson's disease<sup>23-28</sup>. Such  
54 findings indicate an optimum level of genetic variations that an individual can tolerate<sup>29,30</sup>.

55 Nucleotide positions of common SNPs found in normal populations such as in the

---

56 1000 genomes cohort are presumably less conserved than those regions of genome that  
57 are deficient in SNPs. The neutral theory has served as the theoretical foundation for the  
58 inference that most of the human genome (~90%) are freely changeable or selectively  
59 neutral<sup>31</sup>. However, it remains to be empirically verified whether the SNP depleted regions  
60 of the genome can freely tolerate DNMs as expected from such inference. The neutral  
61 theory is widely thought to have failed to explain the genetic diversity riddle and other  
62 major evolutionary phenomenon<sup>32-36</sup>. While a small fraction of DNMs in ASD have been  
63 found to be enriched in deleterious mutations relative to those in normal subjects<sup>16</sup>, it  
64 remains unknown whether the rest or most of DNMs are also deleterious or occur more  
65 often in the genomic regions deficient in SNPs or are overall different from DNMs in  
66 controls.

67 In this study, we investigated whether DNMs in ASD are more enriched in the SNP  
68 deficient sites relative to those in normal subjects and whether DNMs in normal subjects  
69 may show preference for positions bearing the common SNPs. We also studied  
70 nucleotide composition patterns in DNMs in ASDs in terms of AT content (human genome  
71 is known to be ~58% AT) and Chargaff's Parity Rule 1 and 2 (the 1:1 ratio of pyrimidines  
72 and purines)<sup>37, 38</sup>. We found that DNMs in ASDs were more enriched in positions  
73 deficient in common SNPs relative to those in controls and that DNMs in normal  
74 individuals occurred more often in the common SNP sites. DNMs in ASD showed  
75 lower AT content but normal parity patterns. The results do not support the inference  
76 of 90% non-constrained genome as inferred from the neutral model.

77

---

78 **Results:**

79 **DNMs were enriched in sites of common SNPs and less so in ASD**

80 We made use of the DNM database NPdenov<sup>39</sup> to study the genomic mutation  
81 patterns in ASD (<http://www.wzgenomics.cn/NPdenovo/>). We focused on SNVs and  
82 studied 50281 DNMs in control subjects and 28376 DNMs in ASD that were discovered by  
83 whole genome sequencing. We matched the positions of these DNMs with those bearing  
84 SNPs detected in the 1000 genomes project (1KGP) phase 3 dataset<sup>40</sup>. The fraction of  
85 DNM sites matching the SNP sites of 1KGP (total SNPs numbers 81,377,202) in ASD was  
86 found lower than that in the control subjects (2056/28376 or 0.073 vs 4457/50280 or 0.089,  
87  $P < 0.001$ , chi square test, Table 1). For SNPs with minor allele frequency (MAF)  $>0.01$  in  
88 the 1KGP (numbers 12,200,686), the matches were only 108/28376 or 0.0038 for DNM in  
89 ASD versus 354/50280 or 0.0070 for DNM in controls ( $P < 0.001$ , chi square test). Also in  
90 the case of ASD, the fraction of all SNPs matched with DNMs was 2.8 times that of higher  
91 MAF ( $>0.01$ ) SNPs matched with DNMs (0.000025 vs 0.000089,  $P < 0.01$ ), whereas in the  
92 case of controls, the fraction of all SNPs matched with DNMs was only 1.9 times that of  
93 higher MAF ( $>0.01$ ) SNPs matched with DNMs (0.000055 vs 0.000029,  $P < 0.01$ , Table 1),  
94 indicating again that DNMs in ASD cases occurred more often in the rare SNP sites.

95 These results show a preferential depletion of DNMs in positions bearing SNPs,  
96 especially for those bearing the common SNPs (MAF $>0.01$ ), in ASD relative to controls.

97 We analyzed 81.4 million SNPs in 1KGP representing 2.58% of the total number of  
98 bases in the GRCh37 hg19 genome (3.156 billion). If most sites in the genome are neutral  
99 and can accommodate mutations equally, one would expect ~2.58% of DNMs to overlap

---

100 with SNPs. In fact, the infinite site model, which is compatible with the neutral framework  
101 and widely used to interpret observed polymorphisms, predicts this percentage to be  
102 much lower since the model means that new mutations should mostly occur at never  
103 before mutated sites. However, the observed percentage in normal subjects, 8.9% (Table  
104 1), was 3.45 fold higher than the expected value, which was likely an underestimation.  
105 This could be accounted for only if just 29% of the genome can freely accommodate  
106 mutations.

107       There were 12.2 million SNPs with  $MAF > 0.01$  in 1KGP representing 0.39% of the  
108 genome. The observed percentage of DNMs matching SNPs with  $MAF > 0.01$  in normal  
109 subjects was 0.7% in normal subjects and 0.38% in ASD cases. So, the percentage in  
110 normal subjects was 1.81 fold higher than expected while the percentage in ASD cases  
111 was similar to or slightly lower than the expected value. These observations show that  
112 DNMs in normal subjects did not, whereas DNMs in ASD cases did to some extent,  
113 conform to inferences by the infinite site model and the neutral theory. So, most parts of  
114 the genome (71%) may not freely tolerate mutations that can survive as DNMs in healthy  
115 individuals. If de novo mutations do occur mostly on new sites as predicted by the infinite  
116 site model, they would produce a pattern similar to that in the ASD cases but unlike that in  
117 the normal subjects, and hence be associated with diseases.

118       There are hyper-mutable regions in the genome and CpG sites are known to have  
119 higher mutation rates<sup>41</sup>. Such regions would be more tolerable to mutations or under less  
120 functional constraint and hence expected to be enriched with SNPs. If DNMs in ASD tend  
121 to cluster in functionally constrained sites, they should overlap less with those SNP sites

---

122 bearing C or G. We therefore examined among all the DNMs matched with SNP sites the  
123 fraction of DNMs that have reference allele being C, G, A, or T nucleotide (Figure 1). The  
124 results showed that the fraction of DNMs that had C or G but not A or T reference alleles  
125 was significantly higher in controls than in ASD cases, indicating less enrichment of DNMs  
126 in ASD cases in hyper mutable sites. Also, hypermutability did explain a part of the match  
127 of DNMs with SNPs as reference alleles carrying C or G had higher fractions of match  
128 with SNP sites than those carrying A or T (Figure 1). The enrichment of DNMs in  
129 hypermutable regions further confirm that the non constrained regions in the genome may  
130 be much smaller than that expected from the inference based on the neutral framework.

131

### 132 **DNMs in ASD were AT deficient but conformed to parity rules**

133 The human genome shows unexplained AT-bias in base compositions (~58%).  
134 However, the overall AT content in DNMs in ASD cases showed less AT than controls  
135 (16017/28376 or 56.4% in ASD vs 28754/50281 or 57.2% AT in controls,  $P < 0.05$ ). To  
136 study AT content variation of DNMs among individuals, we examined 290 normal and  
137 429 ASD individuals with 30-100 DNMs per individual. Among 429 ASD samples  
138 studied (Table 2), 7 (1.6%) showed AT bias (defined as higher than 58% AT,  $P < 0.05$ )  
139 and 28 (6.5%) showed GC bias (defined as higher than 42% GC,  $P < 0.05$ ). In  
140 comparison, among 290 controls studied, two (0.69%) showed AT bias and 12 (4.1%)  
141 showed GC bias ( $P < 0.05$ ). The incidence of GC bias in ASD was higher than that in  
142 controls ( $P < 0.05$ , chi squared test). The results showed that DNMs in ASD were  
143 significantly different from those in normal subject in being AT deficient.

---

144 DNMs are thought to occur randomly and expected to follow the 1:1 ratio of  
145 pyrimidines and purines (Chargaff's Parity Rule 1 and 2). Random mutation process  
146 predicts that parity should hold for bases either targeted for (reference alleles) or  
147 resulting from mutations (alternative alleles). We confirmed this in our survey of 50281  
148 DNMs in normal individuals as reported in the literature (25016 TC vs 25265 AG for  
149 reference alleles, and 25140 TC vs 25141 AG for alternative alleles). This pattern also  
150 held similarly in 28376 DNMs in ASD (14167 TC vs 14209 AG for reference alleles,  
151 and 14308 TC vs 14068 AG for alternative alleles). Therefore, one expects that  
152 mutations causing parity violations would qualify as non-random, in the same sense  
153 as a biased coin toss. We examined 290 normal and 429 ASD individuals with 30-100  
154 DNMs per individual and found 4.8% (14/290) and 4.2 % (18/429) with parity  
155 violations ( $P < 0.05$ ), respectively. However, none of these were significant after  
156 adjustment for multiple testing. The rate of ~5% parity violations in the general  
157 population or ASD cases was consistent with the random chance of a nonrandom  
158 event as defined by  $P < 0.05$ . The results indicated that DNMs in ASD did not differ in  
159 conforming to parity rules from those in control subjects.

160 Of 18 ASD samples with parity violations, none showed AT bias and 4 showed  
161 GC bias (GC bias as defined by significantly greater than 42%,  $P < 0.05$ ). Of 14 normal  
162 samples with parity violations, none showed AT bias and one showed GC bias. Thus,  
163 of 32 samples with parity violations among 719 samples examined (290 normal and  
164 429 ASD), none showed both parity violation and AT bias (incidence rate  $< 1/719$  or  
165 0.0014). Given the observed random rate of violating the parity rule and the AT bias



---

166 pattern being 0.0445 and 0.0125, respectively, one would expect the random rate of  
167 violating both parity and AT bias pattern to be 0.00056, too low to be observed with  
168 the sample size studied here (719).

169

170 **Discussion:**

171 To better understand the genetics of ASD and the issue of neutral DNAs, we studied  
172 the genomic patterns of DNMs in ASD and normal subjects. Our results showed that  
173 relative to controls DNMs in ASD were more enriched in the conserved and less mutable  
174 regions of the genome that are deficient in common SNPs, which is consistent with  
175 previous findings of ASD probands carrying more DNMs with deleterious effects <sup>16</sup>. This  
176 suggests that the conserved regions of the genome are under natural selection.

177 The neutral model explains the extremely low genetic diversity of humans, in  
178 particular non-Africans, by postulating bottlenecks in the past. This implies that the  
179 genetic diversity of non-Africans today would be much higher or similar to Africans if there  
180 was not bottleneck in the past. It also means that with more time to evolve the genetic  
181 diversity of non-Africans would be much greater in the future than it is now today. Based  
182 on the inference of 90% non-constrained genome under the neutral framework <sup>31</sup>, one  
183 would expect most of the regions that are devoid of SNPs, which is greater than 90%  
184 based on the 1KGP data, to be free from natural selection. Under such inference, one  
185 would not necessarily expect the locations of most DNMs in ASD to be different from  
186 those in control subjects. In particular, the infinite site assumption of the neutral model is a  
187 prerequisite for most studies in the population genetics field and predicts that most DNMs

---

188 should occur at new sites (have not had mutations before) and hence not to be enriched in  
189 SNP sites<sup>42</sup>. In contrast to the inference of only 10% functional human genome based  
190 on the neutral theory<sup>31</sup>, the maximum genetic diversity (MGD) hypothesis postulates  
191 that nearly all DNAs in humans are functional<sup>43,44</sup>. As mutations in functional DNAs  
192 are likely to be deleterious, the fraction of deleterious mutations among all new  
193 mutations would be similar to the fraction of the genome that is functional. Hence, the  
194 MGD theory predicts that most mutations and SNPs are deleterious, whereas the  
195 inference based on the neutral theory predicts only 10% of all new mutations to be  
196 deleterious. The MGD theory further postulates that genetic diversity must have an  
197 optimum upper limit and that genetic diversity in humans has reached saturation today.  
198 Therefore, the MGD hypothesis predicts that DNMs should be more enriched in positions  
199 bearing SNPs and that recurrent mutations should be common.

200 Our results here indicate that 71% of the genome may not be free to incur de novo  
201 mutations, which is much greater than the fraction of the genome (~10%) that is estimated  
202 to be functional by the neutral theory<sup>31</sup>. The results therefore invalidate the neutral model  
203 and its infinite site assumption and support the MGD hypothesis. That SNP sites were  
204 preferentially hit by DNMs was consistent with the finding of saturated or maximum  
205 genetic diversity as observed in present day human populations<sup>45</sup>. Sharing of common  
206 SNPs between different populations appear to be due to recurrent mutations rather than  
207 common ancestry. The neutral null hypothesis has been mostly tested previously by  
208 computational approaches based on uncertain assumptions that take certain sequences  
209 to be neutral for granted (repeats, viral sequences, and non-conserved regions)<sup>31</sup>. Recent

210 empirical studies comparing genetic diversities of patient and control populations have all  
211 contradicted the neutral model<sup>25, 27, 28, 30</sup>. The results here provide additional empirical  
212 evidence not favoring the neutral hypothesis. The rapid advances in genomics in recent  
213 decades have made it practically possible for the first time to empirically test most of the  
214 uncertain assumptions in the field of population genetics and molecular evolution, and we  
215 expect more experimental tests to be performed in the near future. Reestablishing more  
216 realistic and certain assumptions will be key for the field to produce realistic conclusions  
217 that can actually find support from findings in other fields.

218       Because the collective effect of SNPs in numerous complex traits and diseases<sup>25, 27,</sup>  
219 <sup>28, 30, 46</sup>, even common SNPs are also mostly not neutral and only more neutral relative to  
220 the more conserved regions of the genome. Such observations therefore would further  
221 substantially reduce the fraction of neutral sites in the human genome.

222       Base mutations appear to have a bias in the direction of A:T and newly emerged  
223 low-frequency SNP alleles are typically A:T rich<sup>47, 48</sup>. Interestingly, derived species appear  
224 to show more AT bias than ancestral species, and the direction of evolution appears to be  
225 going towards higher AT content<sup>38</sup>. Our observation here of less AT content in DNMs of  
226 ASD indicates that AT content in DNMs of ASD was abnormal and against the trend of  
227 evolution. This may be related to the enigma of how AT content stays at a certain biased  
228 level not expected from random chance. Negative selection due to diseases such ASD  
229 may prevent AT content from increasing without limit. Our results is consistent with a  
230 previous study showing that ASD genes are AT rich<sup>49</sup>. Thus, if mutations occurred in  
231 these AT rich ASD genes, there would be a high probability of mutating non-AT sites,

232 leading to DNMs in these genes to be less rich AT.

233 Parity rules appear to apply in DNMs in both ASD and control subjects. Individuals  
234 with parity violations or AT bias exist in frequencies expected by random chance (~0.5%)  
235 in both ASD and controls. This confirms that DNMs occur mostly in a random fashion and  
236 obey probability rules. The event of both parity violation and AT bias in DNMs in an  
237 individual appears to be rare and future larger sample size studies are required to reveal  
238 whether such event may occur in reality.

239

#### 240 **Materials and Methods:**

241 DNMs data from ASD and normal subjects were downloaded from NPdenovo  
242 database (<http://www.wzgenomics.cn/NPdenovo/>)<sup>39</sup>. These DNMs were all found by  
243 whole genome sequencing analyses. For SNPs, we downloaded vcf files of the 1KGP  
244 phase 3 dataset<sup>40</sup>. We used MAF data in the vcf file based on all ~2500 individuals in the  
245 1KGP.

246 Data manipulations were done using custom scripts. Standard statistics methods  
247 were used including chi squared test (2 tailed) and Bonferroni correction for multiple  
248 testing and the statistics software Graphpad Prism6 was used for these analyses.

249

#### 250 **Acknowledgments:**

251 We thank Jinchen Li for help with the NPdenovo database. This work was  
252 supported by the National Natural Science Foundation of China grant 81171880 and  
253 the National Basic Research Program of China grant 2011CB51001 (S.H.).

254

255 **Conflict of Interest Statements:**

256 The authors declare that they have no competing interests.

257

258 **Author Contributions:**

259 YZ and SH designed the analysis, analyzed data and wrote paper.

260

261 **References:**

- 262 1. Christensen DL, Baio J, Van Naarden Braun K, Bilder D, Charles J, Constantino JN *et al.*  
263 Prevalence and Characteristics of Autism Spectrum Disorder Among Children Aged 8  
264 Years--Autism and Developmental Disabilities Monitoring Network, 11 Sites, United States,  
265 2012. *MMWR Surveill Summ* 2016; **65**(3): 1-23.  
266
- 267 2. Lord C, Schopler E, Revicki D. Sex differences in autism. *J Autism Dev Disord* 1982; **12**(4):  
268 317-330.  
269
- 270 3. Wing L, Wing JK. *Early childhood autism : clinical, educational, and social aspects*. 2d edn.  
271 Pergamon Press: Oxford ; New York, 1976, xii, 342 p.pp.  
272
- 273 4. Wood CL, Warnell F, Johnson M, Hames A, Pearce MS, McConachie H *et al.* Evidence for ASD  
274 recurrence rates and reproductive stoppage from large UK ASD research family databases.  
275 *Autism Res* 2015; **8**(1): 73-81.  
276
- 277 5. Bailey A, Le Couteur A, Gottesman I, Bolton P, Simonoff E, Yuzda E *et al.* Autism as a strongly  
278 genetic disorder: evidence from a British twin study. *Psychol Med* 1995; **25**(1): 63-77.  
279
- 280 6. Geschwind DH. Advances in autism. *Annu Rev Med* 2009; **60**: 367-380.  
281
- 282 7. Geschwind DH. Genetics of autism spectrum disorders. *Trends Cogn Sci* 2011; **15**(9): 409-416.  
283
- 284 8. Hallmayer J, Cleveland S, Torres A, Phillips J, Cohen B, Torigoe T *et al.* Genetic heritability and  
285 shared environmental factors among twin pairs with autism. *Arch Gen Psychiatry* 2011;  
286 **68**(11): 1095-1102.  
287
- 288 9. Robinson EB, Koenen KC, McCormick MC, Munir K, Hallett V, Happe F *et al.* A multivariate  
289 twin study of autistic traits in 12-year-olds: testing the fractionable autism triad hypothesis.

- 
- 290 *Behav Genet* 2012; **42**(2): 245-255.
- 291
- 292 10. Gaugler T, Klei L, Sanders SJ, Bodea CA, Goldberg AP, Lee AB *et al.* Most genetic risk for autism  
293 resides with common variation. *Nat Genet* 2014; **46**(8): 881-885.
- 294
- 295 11. Chahrour MH, Yu TW, Lim ET, Ataman B, Coulter ME, Hill RS *et al.* Whole-exome sequencing  
296 and homozygosity analysis implicate depolarization-regulated neuronal genes in autism. *PLoS*  
297 *Genet* 2012; **8**(4): e1002635.
- 298
- 299 12. Iossifov I, O'Roak BJ, Sanders SJ, Ronemus M, Krumm N, Levy D *et al.* The contribution of de  
300 novo coding mutations to autism spectrum disorder. *Nature* 2014; **515**(7526): 216-221.
- 301
- 302 13. Sanders SJ, Murtha MT, Gupta AR, Murdoch JD, Raubeson MJ, Willsey AJ *et al.* De novo  
303 mutations revealed by whole-exome sequencing are strongly associated with autism. *Nature*  
304 2012; **485**(7397): 237-241.
- 305
- 306 14. O'Roak BJ, Vives L, Girirajan S, Karakoc E, Krumm N, Coe BP *et al.* Sporadic autism exomes  
307 reveal a highly interconnected protein network of de novo mutations. *Nature* 2012;  
308 **485**(7397): 246-250.
- 309
- 310 15. Neale BM, Kou Y, Liu L, Ma'ayan A, Samocha KE, Sabo A *et al.* Patterns and rates of exonic de  
311 novo mutations in autism spectrum disorders. *Nature* 2012; **485**(7397): 242-245.
- 312
- 313 16. Turner TN, Coe BP, Dickel DE, Hoekzema K, Nelson BJ, Zody MC *et al.* Genomic Patterns of De  
314 Novo Mutation in Simplex Autism. *Cell* 2017; **171**(3): 710-722 e712.
- 315
- 316 17. Devlin B, Melhem N, Roeder K. Do common variants play a role in risk for autism? Evidence  
317 and theoretical musings. *Brain Res* 2011; **1380**: 78-84.
- 318
- 319 18. Pan Y, Chen J, Guo H, Ou J, Peng Y, Liu Q *et al.* Association of genetic variants of GRIN2B with  
320 autism. *Sci Rep* 2015; **5**: 8296.
- 321
- 322 19. Xia K, Guo H, Hu Z, Xun G, Zuo L, Peng Y *et al.* Common genetic variants on 1p13.2 associate  
323 with risk of autism. *Mol Psychiatry* 2014; **19**(11): 1212-1219.
- 324
- 325 20. Wang K, Zhang H, Ma D, Bucan M, Glessner JT, Abrahams BS *et al.* Common genetic variants  
326 on 5p14.1 associate with autism spectrum disorders. *Nature* 2009; **459**(7246): 528-533.
- 327
- 328 21. Klei L, Sanders SJ, Murtha MT, Hus V, Lowe JK, Willsey AJ *et al.* Common genetic variants,  
329 acting additively, are a major source of risk for autism. *Mol Autism* 2012; **3**(1): 9.
- 330
- 331 22. Zhu Z, Lu X, Yuan D, Huang S. Close genetic relationships between a spousal pair with  
332 autism-affected children and high minor allele content in cases in autism-associated SNPs.  
333 *Genomics* 2017; **109**(1): 9-15.

- 
- 334  
335 23. Zhu Z, Man X, Xia M, Huang Y, Yuan D, Huang S. Collective effects of SNPs on  
336 transgenerational inheritance in *Caenorhabditis elegans* and budding yeast. *Genomics* 2015;  
337 **106**(1): 23-29.  
338
- 339 24. Zhu Z, Lu Q, Wang J, Huang S. Collective effects of common SNPs in foraging decisions in  
340 *Caenorhabditis elegans* and an integrative method of identification of candidate genes. *Sci*  
341 *Rep* 2015; **5**: 16904.  
342
- 343 25. Zhu Z, Yuan D, Luo D, Lu X, Huang S. Enrichment of Minor Alleles of Common SNPs and  
344 Improved Risk Prediction for Parkinson's Disease. *PLoS One* 2015; **10**(7): e0133421.  
345
- 346 26. Yuan D, Zhu Z, Tan X, Liang J, Zeng C, Zhang J *et al.* Scoring the collective effects of SNPs:  
347 association of minor alleles with complex traits in model organisms. *Sci China Life Sci* 2014;  
348 **57**(9): 876-888.  
349
- 350 27. He P, Lei X, Yuan D, Zhu Z, Huang S. Accumulation of minor alleles and risk prediction in  
351 schizophrenia. *Sci Rep* 2017; **7**(1): 11661.  
352
- 353 28. Lei X, Huang S. Enrichment of minor allele of SNPs and genetic prediction of type 2 diabetes  
354 risk in British population. *PLoS One* 2017; **12**(11): e0187644.  
355
- 356 29. Hu T, Long M, Yuan D, Zhu Z, Huang Y, Huang S. The genetic equidistance result: misreading  
357 by the molecular clock and neutral theory and reinterpretation nearly half of a century later.  
358 *Sci China Life Sci* 2013; **56**(3): 254-261.  
359
- 360 30. Huang S. New thoughts on an old riddle: What determines genetic diversity within and  
361 between species? *Genomics* 2016; **108**(1): 3-10.  
362
- 363 31. Ponting CP, Hardison RC. What fraction of the human genome is functional? *Genome Res*  
364 2011; **21**(11): 1769-1776.  
365
- 366 32. Hahn MW. Toward a selection theory of molecular evolution. *Evolution* 2008; **62**(2): 255-265.  
367
- 368 33. Kern AD, Hahn MW. The Neutral Theory in Light of Natural Selection. *Mol Biol Evol* 2018;  
369 **35**(6): 1366-1371.  
370
- 371 34. Kreitman M. The neutral theory is dead. Long live the neutral theory. *Bioessays* 1996; **18**(8):  
372 678-683; discussion 683.  
373
- 374 35. Leffler EM, Bullaughey K, Matute DR, Meyer WK, Segurel L, Venkat A *et al.* Revisiting an old  
375 riddle: what determines genetic diversity levels within species? *PLoS Biol* 2012; **10**(9):  
376 e1001388.  
377

- 
- 378 36. Ohta T, Gillespie JH. Development of Neutral and Nearly Neutral Theories. *Theor Popul Biol*  
379 1996; **49**(2): 128-142.  
380
- 381 37. Rudner R, Karkas JD, Chargaff E. Separation of *B. subtilis* DNA into complementary strands. 3.  
382 Direct analysis. *Proc Natl Acad Sci U S A* 1968; **60**(3): 921-922.  
383
- 384 38. Li X, Scanlon MJ, Yu J. Evolutionary patterns of DNA base composition and correlation to  
385 polymorphisms in DNA repair systems. *Nucleic Acids Res* 2015; **43**(7): 3614-3625.  
386
- 387 39. Li J, Cai T, Jiang Y, Chen H, He X, Chen C *et al.* Genes with de novo mutations are shared by  
388 four neuropsychiatric disorders discovered from NPdenovo database. *Mol Psychiatry* 2016;  
389 **21**(2): 290-297.  
390
- 391 40. Auton A, Brooks LD, Durbin RM, Garrison EP, Kang HM, Korbel JO *et al.* A global reference for  
392 human genetic variation. *Nature* 2015; **526**(7571): 68-74.  
393
- 394 41. Nachman MW, Crowell SL. Estimate of the mutation rate per nucleotide in humans. *Genetics*  
395 2000; **156**(1): 297-304.  
396
- 397 42. Kimura M, Crow JF. The Number of Alleles That Can Be Maintained in a Finite Population.  
398 *Genetics* 1964; **49**: 725-738.  
399
- 400 43. Huang S. *Histone methylation and the initiation of cancer*. CRC Press: New York, 2008.  
401
- 402 44. Huang S. Inverse Relationship Between Genetic Diversity and Epigenetic Complexity. Available  
403 from Nature Precedings <http://dx.doi.org/10.1038/npre.2009.1751.2>, 2009.  
404
- 405 45. Yuan D, Lei X, Gui Y, Zhu Z, Wang D, Yu J *et al.* Modern human origins: multiregional evolution  
406 of autosomes and East Asia origin of Y and mtDNA. *bioRxiv* 2017.  
407
- 408 46. Lei X, Yuan D, Zhu Z, Huang S. Collective effects of common SNPs and risk prediction in lung  
409 cancer. *Heredity (Edinb)* 2018.  
410
- 411 47. Hershberg R, Petrov DA. Evidence that mutation is universally biased towards AT in bacteria.  
412 *PLoS Genet* 2010; **6**(9): e1001115.  
413
- 414 48. Lynch M. Rate, molecular spectrum, and consequences of human mutation. *Proc Natl Acad*  
415 *Sci U S A* 2010; **107**(3): 961-968.  
416
- 417 49. Jabbari K, Nurnberg P. A genomic view on epilepsy and autism candidate genes. *Genomics*  
418 2016; **108**(1): 31-36.  
419  
420  
421





423 **Tables**

424

**Table 1. Match of DNMs with common SNPs**

| Fractions matched | ASD cases |             | Controls |            |
|-------------------|-----------|-------------|----------|------------|
|                   | DNM       | SNPs        | DNM      | SNPs       |
| All SNPs          | 0.0725    |             | 0.089*** |            |
| All DNMs          |           | 0.000025    |          | 0.000055   |
| SNPs (MAF>0.01)   | 0.0038    |             | 0.007*** |            |
| DNMs (MAF>0.01)   |           | 0.0000089** |          | 0.000029** |

\*\*\*, P< 0.001, ASD cases vs controls, chi squared test; \*\*, P< 0.01, All SNPs vs  
SNPs with MAF>0.01.

425

426

**Table 2. AT contents analyses.**

|          | AT %   | AT bias % | GC bias % |
|----------|--------|-----------|-----------|
| ASD      | 56.4   | 1.6       | 6.5       |
| Controls | 57.2   | 0.69      | 4.1       |
| P value  | < 0.05 | > 0.05    | < 0.05    |

427

428

429

430

431

432 **Figure legends**

433

434 **Figure 1. Fraction of DNMs with reference allele being C, G, A, or T nucleotide**

435 **among all DNMs matched with SNP sites in 1KGP. \*\*\*,  $P < 0.001$ , chi-squared test, 2**

436 **tailed. The fractions of C or G were all significantly higher than that of A or T with P value**

437 **shown for only some comparisons due to space constraints.**

438

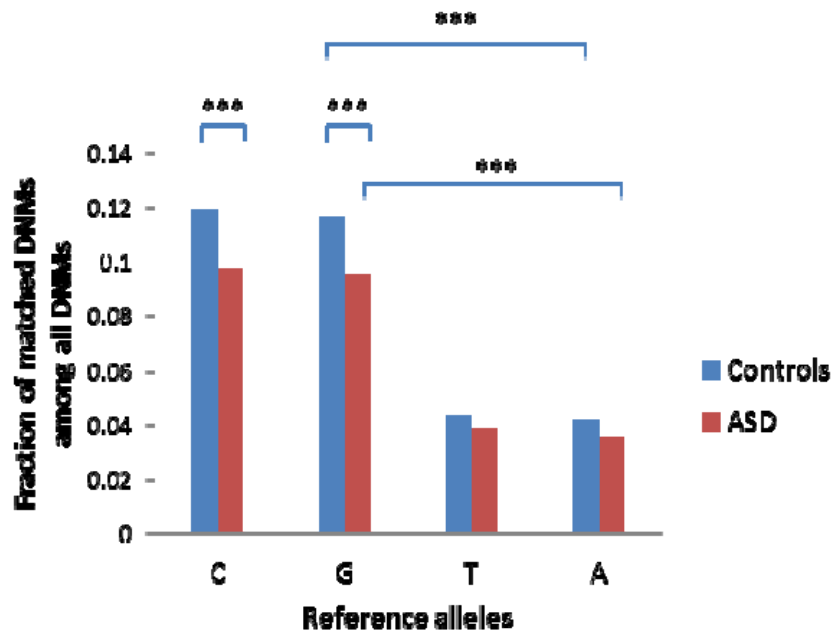

439
